## Retraction

**Retraction: Inhibition of YAP function overcomes BRAF inhibitor resistance in melanoma cancer stem cells****Matthew L. Fisher<sup>1</sup>, Daniel Grun<sup>1</sup>, Gautam Adhikary<sup>1</sup>, Wen Xu<sup>1</sup> and Richard L. Eckert<sup>1,2,3,4</sup>**<sup>1</sup>Department of Biochemistry and Molecular Biology, University of Maryland School of Medicine, Baltimore, Maryland, 21201, USA<sup>2</sup>Department of Dermatology, University of Maryland School of Medicine, Baltimore, Maryland, 21201, USA<sup>3</sup>Department of Reproductive Biology, University of Maryland School of Medicine, Baltimore, Maryland, 21201, USA<sup>4</sup>The Marlene and Stewart Greenebaum Comprehensive Cancer Center, University of Maryland School of Medicine, Baltimore, Maryland, 21201, USA**Published:****Copyright:** © 2024 Fisher et al. This is an open access article distributed under the terms of the [Creative Commons Attribution License](#) (CC BY 4.0), which permits unrestricted use, distribution, and reproduction in any medium, provided the original author and source are credited.

**This article has been retracted:** The Office of Research Integrity Investigation (NIH) concluded that Richard L. Eckert, Ph.D. engaged in research misconduct by intentionally, knowingly, or recklessly falsifying and/or fabricating data in the thirteen (13) papers published in different journals and two (2) PHS grant applications. One paper was published in Oncotarget. Specifically, In Figure 3F the bands in rows 4 and 7 of the A375-PLX-R right-side panel, representing expression of TAZ-P (row 4) and ERK1/2 (row 7), are falsified and/or fabricated by using unrelated bands from a source image representing different proteins in an unrelated experiment. As a result, the paper was retracted from Oncotarget.

Original article: Oncotarget. 2017; 8:110257–110272. <https://doi.org/10.18632/oncotarget.22628>
